# Supplementary material for: Self-assembling phenomena of benzo-18-crown-6/crowned-spirobenzopyran copolymers in aqueous solution and controlled release of entrapped organic dyes using external stimuli
Source: Royal Society of Chemistry journal article supplement (doi:10.1039/c2sm07131b), 2012-01-01
Supplement: c2sm07131b.pdf [file c2sm07131b.pdf]

## Supporting Information for

**Self-assembling phenomena of benzo-18-crown-6/crowned-spirobenzopyran copolymers in aqueous solution and controlled release of entrapped organic dyes using external stimuli**

**Yoshio Nakahara, Yuki Okazaki and Keiichi Kimura\***

*Department of Applied Chemistry, Faculty of Systems Engineering, Wakayama University,  
Sakae-dani 930, Wakayama 640-8510, Japan.*

## Supporting Information

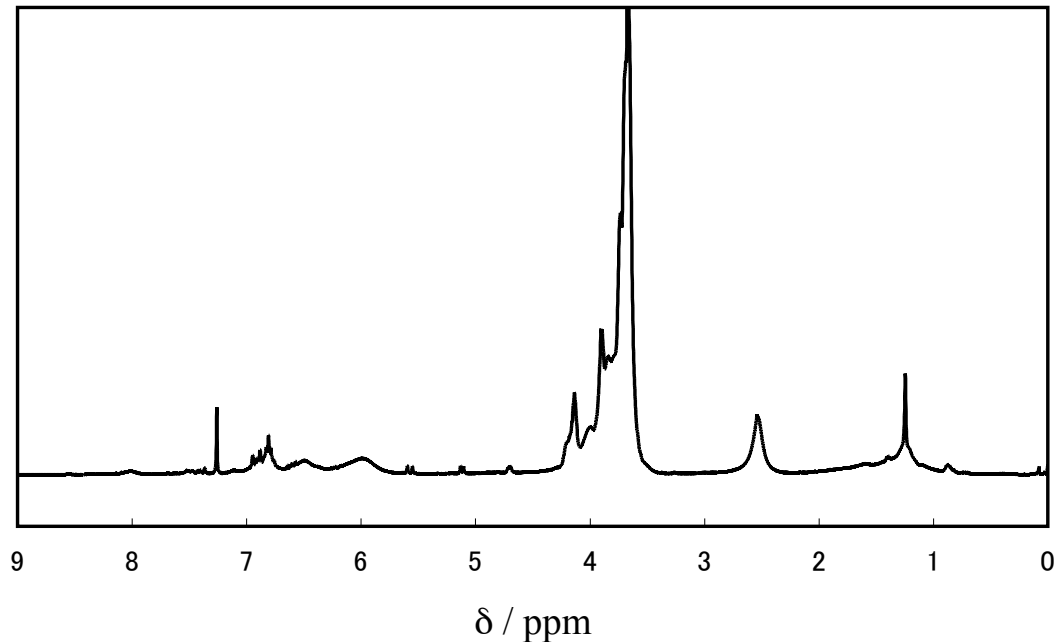

**Figure S1.**  $^1\text{H-NMR}$  spectrum of poly(BC-co-cSP) in  $\text{CDCl}_3$ .
